# Supplementary material
Source: publisher figshare collection journal article supplement (https://tandf.figshare.com/articles/dataset/_/1378749)
Supplement: Supplementary file 1 [file 2]

Table S1. List of PCR primers

| Gene | Forward | Reverse | No. of cycles |
| --- | --- | --- | --- |
| *MEF2C*  *MEF2C(frag1)*  *MEF2C(frag2)*  *RBM4 promoter*  *RBM4 (dist)*  *RBM4(Prox)*  *PPAR2* | tccacctcggctctgtaact  atcaagcttagtactctctgagtagtg  atcggtaccgagctaaacactgtatct  atcggtacccctctaaagtcggttctag  tgcccaatcagcgagttcg  caaacccctattccatgctgtt | atctcgaaggggtggtggta  atcggtacccttatactataaatgccttc  atcggatcctcatgttgcccatccttc  atcctcgagcccaagggagtgagagaag  gccagcagtccacagtgta  aatggcattctgtgtcaacc | 35  35 |
| *C/EBP* | gcggggttgttgatgttt | ctttaatgctcgaaacgg | 35 |
| *BMP7* | gaaaacagcagcagtgacca | ggtggcgttcatgtaggagt | 35 |
| *UCP1* | ctcaggattggcctctacgactc | ttggtgtacatggacatcgca | 35 |
| *PRDM16* | gtcagaggagaaatttgatgg | agaaggaatgctgtgagtag | 35 |
| *GAPDH* | cggagtcaacggatttggtcgtatg | agccttctccatggtggtgaagac | 30 |
| *SV40*  *miR-1 (F)*  *miR-133(F)*  *miR-polyA(R)*  *16S rRNA* | ttttggaggcctaggctttt  tggaatgtaaagaagtat  tttggtccccttcaaccagctg  agagtttgatcmtggctcag | ccgaggcggccgacatgttt  ggmtaccttgttacgactt | 35  35  35  30 |

Table S2. List of quantitative PCR primers

| Gene | Forward | Reverse |
| --- | --- | --- |
| *C/EBP* | caagttccgcagggtgct | ccaagaagacggtggacaa |
| *BMP7* | gaaaacagcagcagtgacca | ggtggcgttcatgtaggagt |
| *UCP1* | tacacggggacctacaatgct | ggtcactggaagatatggc |
| *PRDM16* | gacattccaatcccaccaga | cacctctgtatccgtcagca |
| *GAPDH* | cggagtcaacggatttggtcgtatg | agccttctccatggtggtgaagac |
